# Supplementary material for: Hypoparathyroidism after total thyroidectomy in patients with previous gastric bypass
Source: Springer Nature journal article supplement (doi:10.1007/s00423-016-1517-x), 2016-10-25

**Figure 1S. Number of gastric bypass operations performed in Sweden 1998-2014. Data from National patient registry (1998-2014), SOReg (2007-2014) [20] and other sources**

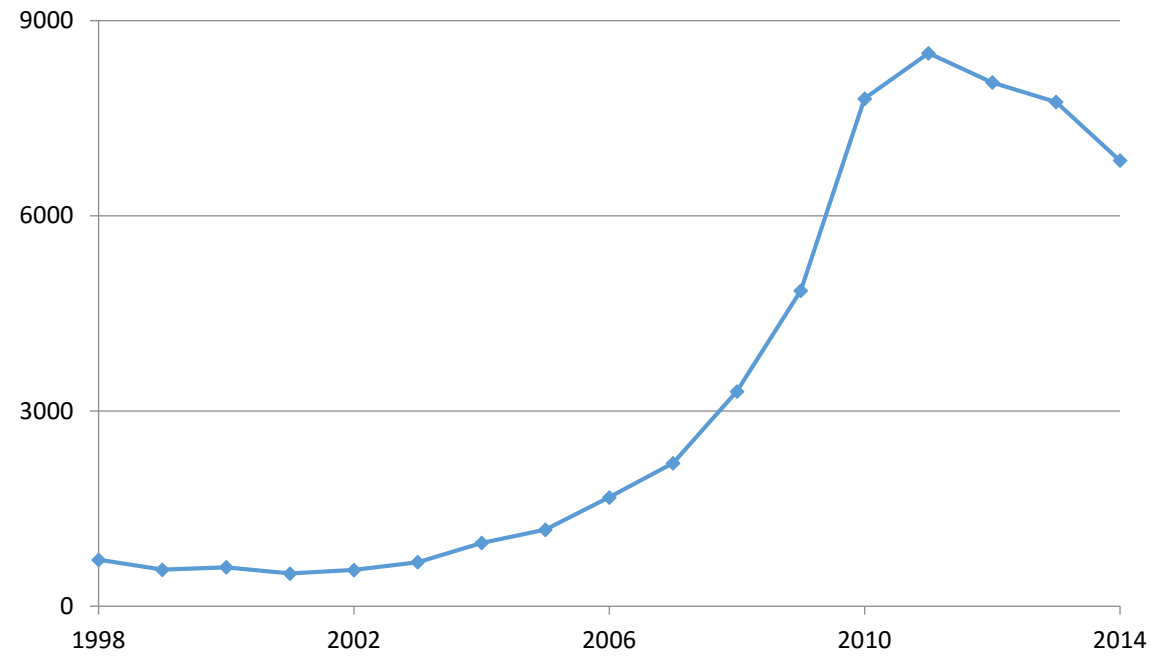

Supplement: MOESM1 [file 10985848]
